# Supplementary material for: Mifepristone Directly Disrupts Mouse Embryonic Development in Terms of Cellular Proliferation and Maturation In Vitro
Source: MDPI journal article supplement (doi:10.3390/toxics9110294), 2021-11-05
Supplement: s1 [file s1]

# Supplementary Materials: Mifepristone Directly Disrupts Mouse Embryonic Development in Terms of Cellular Proliferation and Maturation In Vitro

Yu-Ting Su, Jia-Shing Chen, Yi-Ru Tsai, Kuo-Chung Lan, Cheng-Chun Wu and Fu-Jen Huang

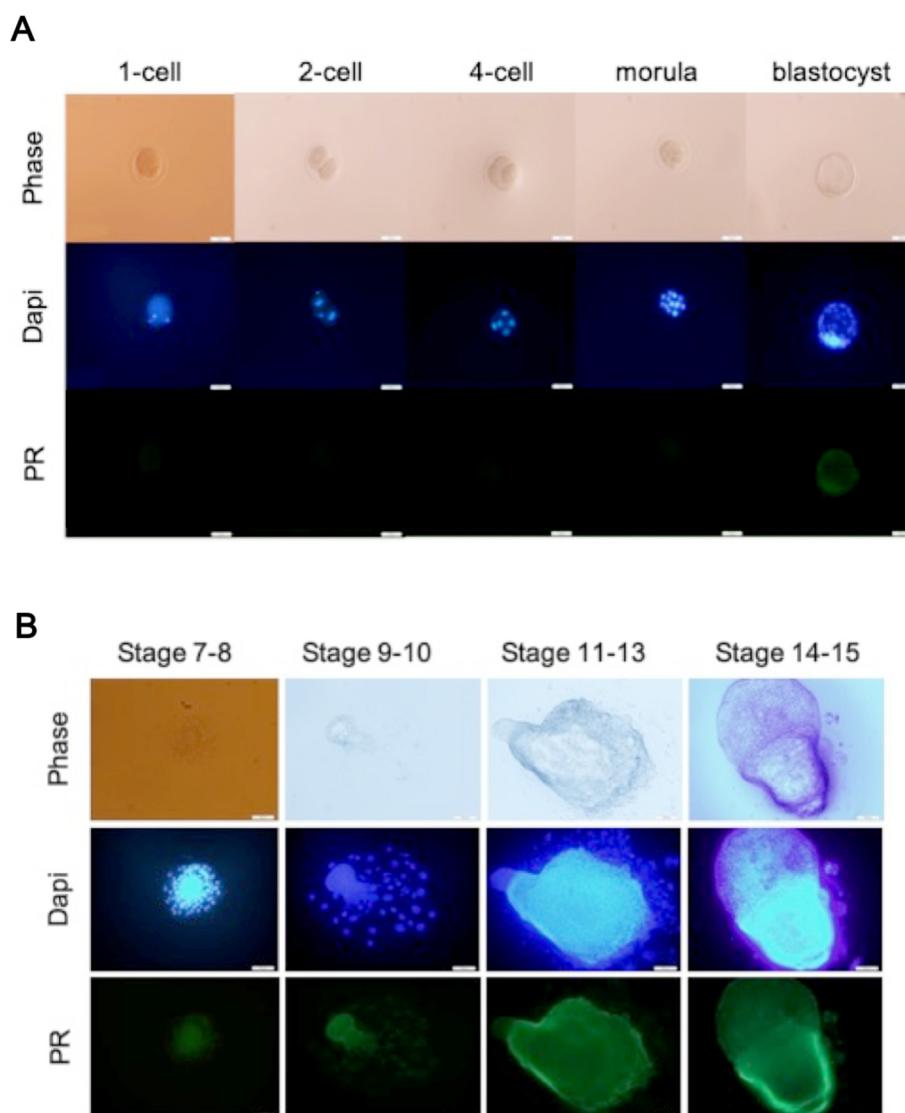

**Figure S1.** The embryos presented progesterone receptor (PR) since the developmental stage of blastocysts. **(A)** We collected and cultured the mouse embryos in vitro, and performed immunofluorescent staining for PR at stages of 1- cell to blastocysts. **(B)** The mouse embryos at developmental stages of stage 7 – 15 presented PR observed by immunofluorescent staining. Bar: 25  $\mu$ m.

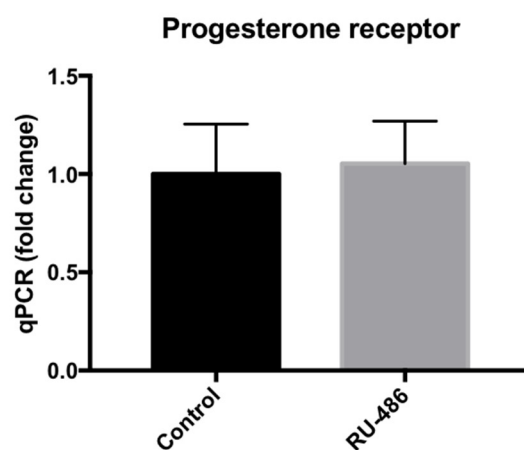

**Figure S2.** RU-486 treatment did not affect the level of progesterone receptor (PR) in mouse blastocysts. We collected the samples for qPCR from cultured blastocysts following exposure in 20  $\mu$ M of RU-486 for 48 h and followed by culturing for 6 days. Control  $n = 5$ , RU-486  $n = 5$ . Data present in Mean  $\pm$  SEM.

10

11

12

13
